# Supplementary material
Source: PubMed Central journal article supplement (PMC3249976)
Supplement: NIHMS321875-supplement-pdf.pdf [file NIHMS321875-supplement-pdf.pdf]

**Supplemental Table 1. Primers used in RT-PCR analysis**

| Gene      | Forward Primer (5' – 3')  | Reverse Primer (5' – 3')       | Product (bp) | Ta (°C) |
|-----------|---------------------------|--------------------------------|--------------|---------|
| TRAIL     | GTGTACTTTACCAACGAG        | TTGCTCAGGAATGAATGC             | 391          | 50      |
| ABL-1     | TTCAGCGGCCAGTAGCATCTGACTT | TGTGATTATAGCCTAAGACCCGGAGCTTTT | 201          | 60      |
| TRAIL-R4  | AGCTGTGGTTGTGGTTGG        | GGGTCAAGTACGGACTG              | 583          | 50      |
| TGF-β1    | GCCCTGGACACCAACTATTGC     | AGGCTCCAAATGTAGGGGCAG          | 164          | 60      |
| Fas       | CACTATTGCTGGAGTCAT        | CTGAGTCACTAGTAATGTCC           | 246          | 50      |
| Caspase-7 | CAAAGCCACTGACTGAGATG      | CAACCCAATGAATAAATGAT           | 258          | 50      |
| TRAIL-R2  | ACAGTGTGTCAGTGCGAAGA      | GCTGGAGGTCACCGTC               | 201          | 53      |
| PDCD4     | CCTTGCTGAGTTATTAGGCTATGTA | AAGCAGTATTGATTCTTTATGGGA       | 448          | 53      |
| API5L     | CGTGTCCAGACTACCCGTTTCCT   | TTTATATCAGACAACCTTCGCTTAG      | 485          | 50      |
| CSE1      | GCTCCAGTATCTCCAAGGGTA     | TCTCCACAGTGTCGGTCAA            | 364          | 53      |
| BNIP2     | TGCATCTTCTTCGGTGAA        | TAACCATCTGTTGCCTTATGA          | 237          | 53      |
| HDAC1     | TTCAAGCCGGTCATGTCCAAAG    | TTTGATCTTCTCCAGGTACTC          | 366          | 55      |

(Ta= Annealing temperature)

**Supplemental Table 2. VD-regulated genes reported by different researchers using microarray analysis in different cancer cell lines.**

|                                    | Krishnan<br>(LNCaP) | Wood<br>(Caco-2) | Palmer<br>(SW480) | Palmer<br>(LS-174T) | Swami<br>(MCF7) | Swami<br>(MDA) | Akutsu<br>(SCC) | Lin<br>(SCC) | Zhang<br>(OVCAR3) |
|------------------------------------|---------------------|------------------|-------------------|---------------------|-----------------|----------------|-----------------|--------------|-------------------|
| Krishnan (21)<br>(LNCaP, Prostate) | 22                  |                  |                   |                     |                 |                |                 |              |                   |
| Wood (23)<br>(Caco-2, Colon)       | 0                   | 12               |                   |                     |                 |                |                 |              |                   |
| Palmer (24)<br>(SW480, Colon)      | 1                   | 3                | 198               |                     |                 |                |                 |              |                   |
| Palmer (24)<br>(LS-174T, Colon)    | 0                   | 0                | 5                 | 17                  |                 |                |                 |              |                   |
| Swami (22)<br>(MCF7, Breast)       | 0                   | 1                | 4                 | 1                   | 69              |                |                 |              |                   |
| Swami (22)<br>(MDA, Breast)        | 0                   | 1                | 2                 | 1                   | 9               | 30             |                 |              |                   |
| Akutsu (26)<br>(SCC, Squamous)     | 0                   | 0                | 0                 | 0                   | 2               | 0              | 32              |              |                   |
| Lin (25)<br>(SCC, Squamous)        | 0                   | 3                | 14                | 3                   | 2               | 2              | 2               | 152          |                   |
| Zhang *<br>(OVCAR3, Ovarian)       | 0                   | 3                | 5                 | 1                   | 1               | 2              | 0               | 7            | 96                |

(Authors, references, cell lines used and cancer types are indicated in the first column and row. Numbers show overlapped gene numbers when compared two different researches. \*: This study.)
